# Supplementary figures and images for: A Novel Strategy for Constructing an Integrated Linkage Map in an F1 Hybrid Population of Populus deltoides and Populus simonii
Source: MDPI journal article supplement (doi:10.3390/genes13101731), 2022-09-26

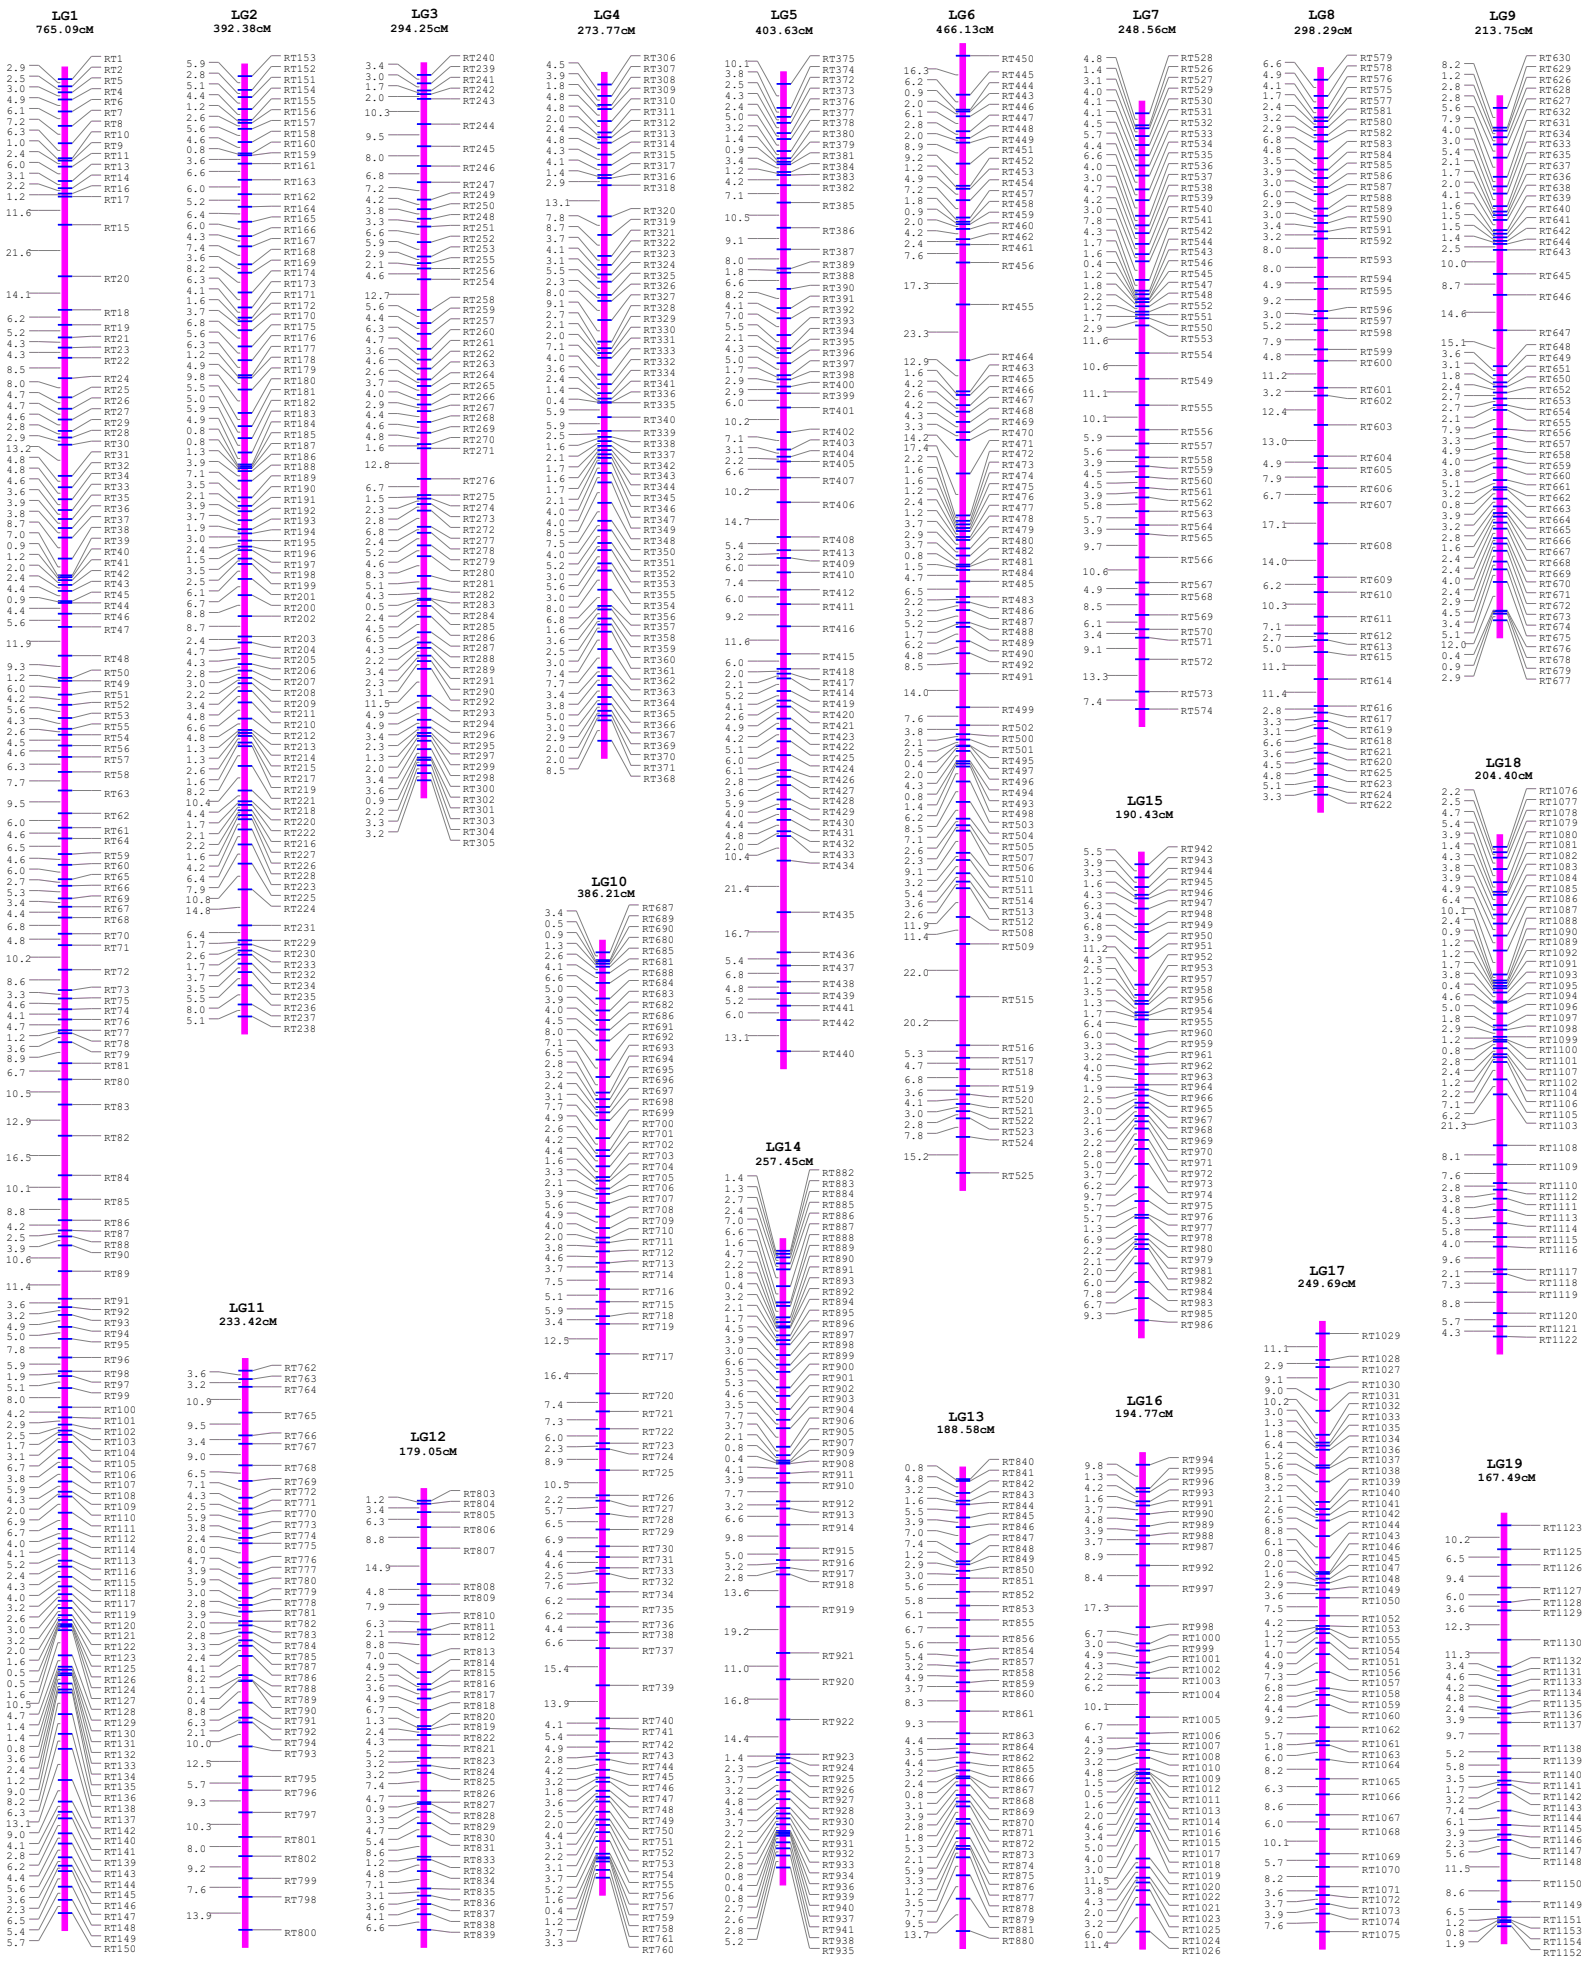

Supplement: s1 [file s1]

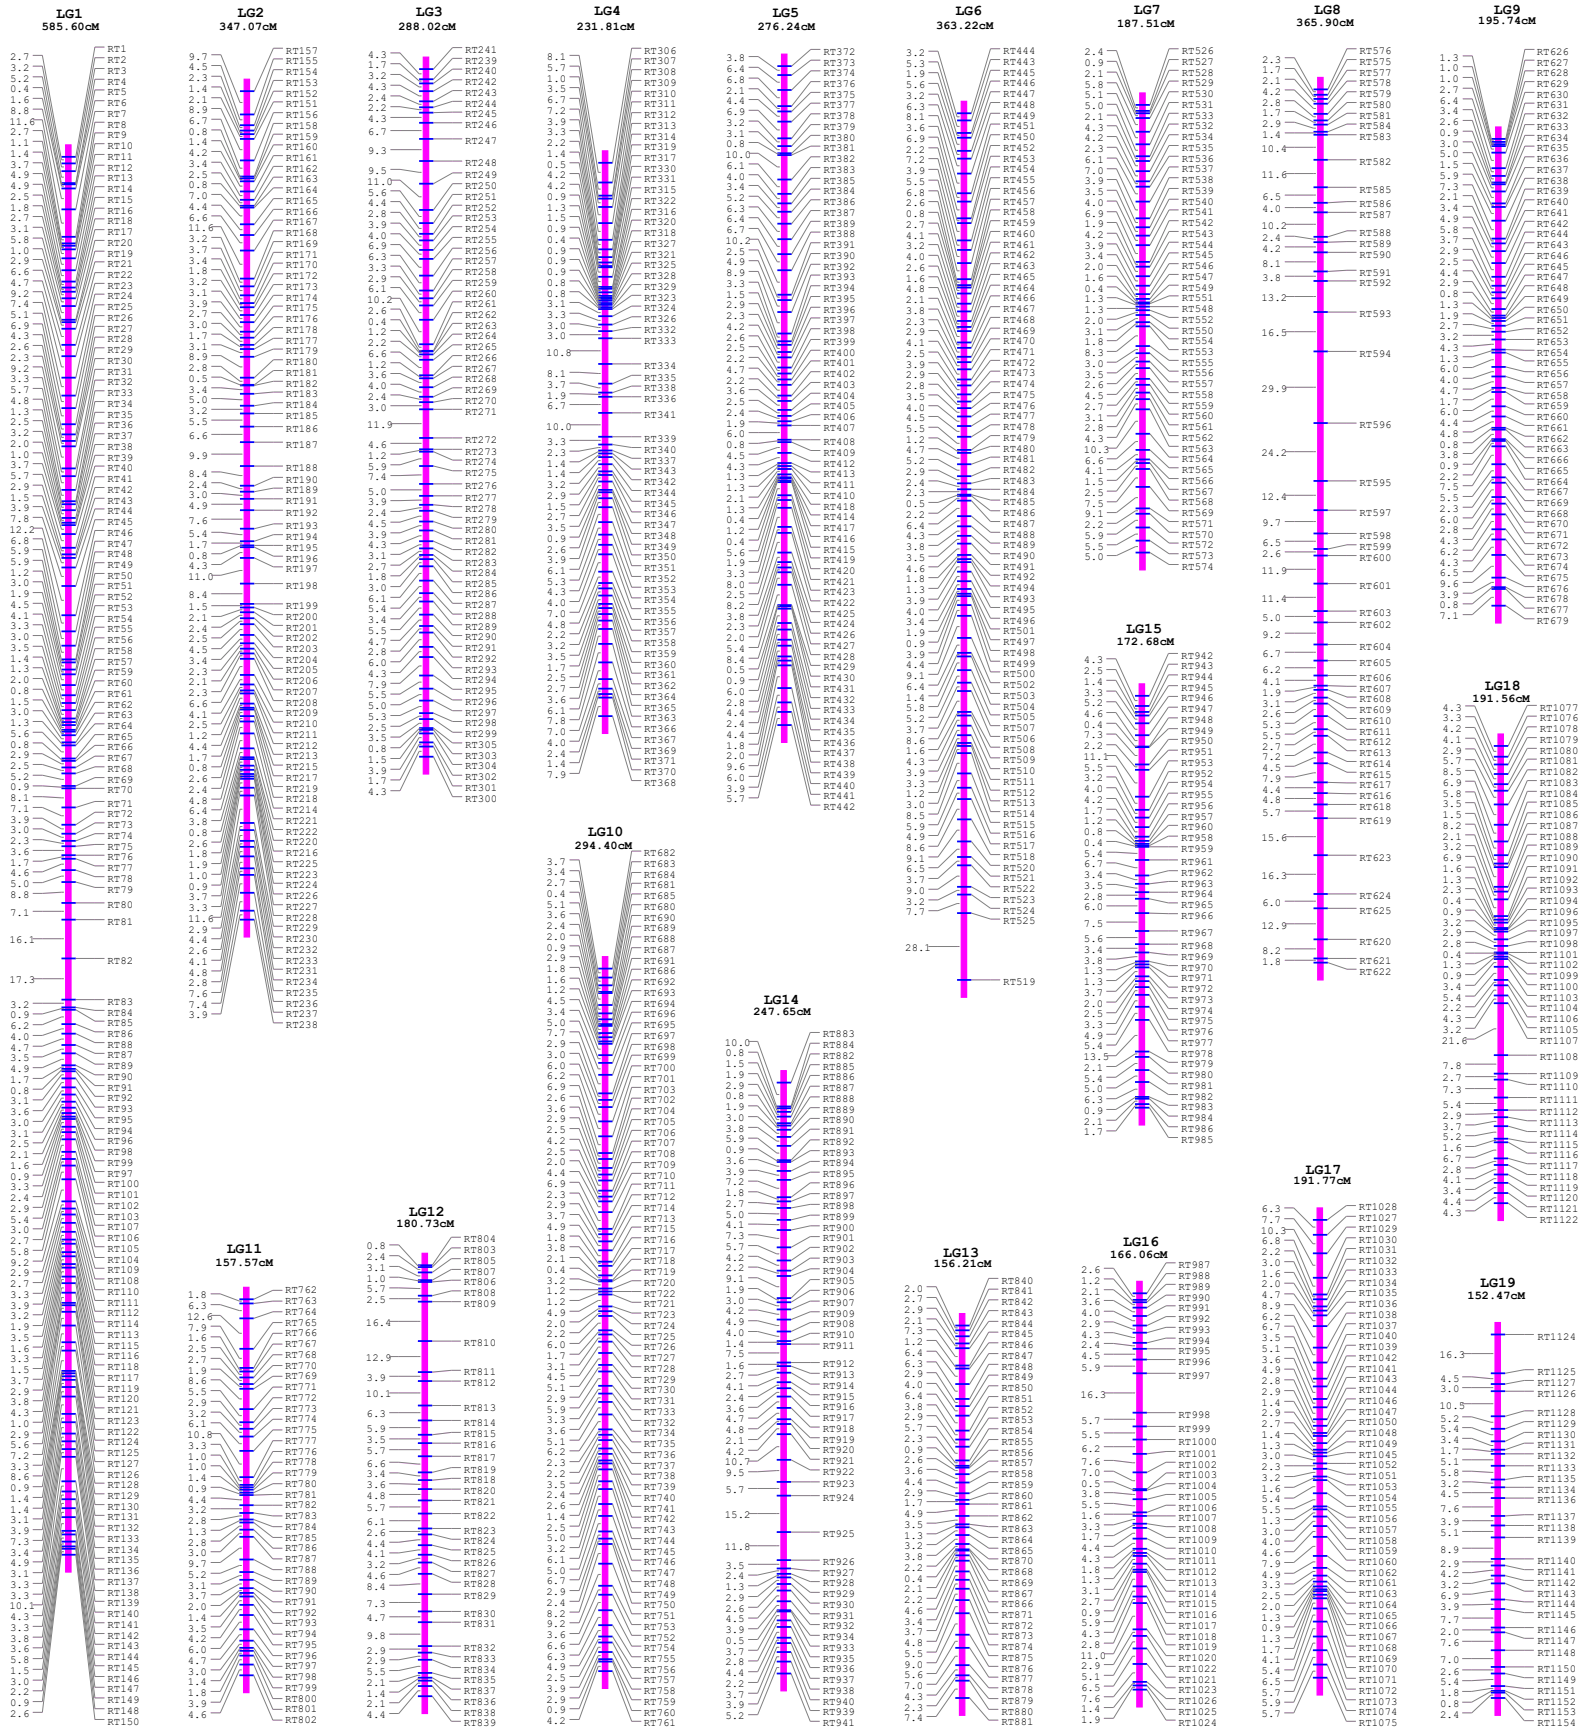

Supplement: s1 [file s1]
